# Supplementary material for: Microfluidic fabrication of microparticles with multiple structures from a biodegradable polymer blend
Source: Royal Society of Chemistry journal article supplement (doi:10.1039/c4ra05864j), 2014-09-19
Supplement: c4ra05864j1.pdf [file c4ra05864j1.pdf]

## Supplementary Information

# Microfluidic Fabrication of Microparticles with Multiple Structures from a Biodegradable polymer Blend

Sang Woo Kim, Kyung-Hee Hwangbo, Joo Hyuk Lee and Kuk Young Cho\*

Division of Advanced Materials Engineering, Kongju National University, 1223-24, Cheonan-daero, Seobuk-gu, Cheonan, Chungnam, Korea, 331-717

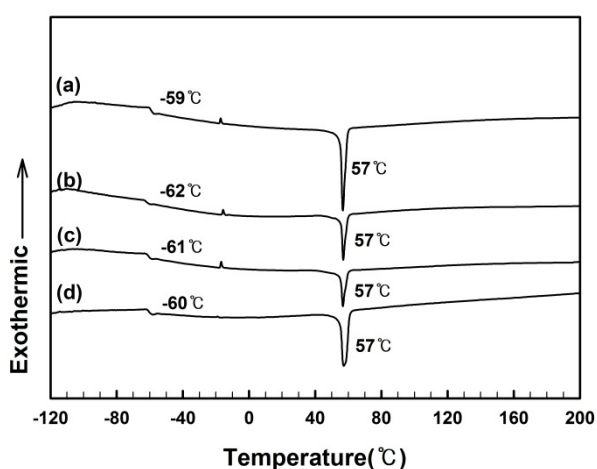

**Figure S1.** DSC curves of various blend ratio with (a) PLGA:PCL=8:2, (b) PLGA:PCL=6:4, (c) PLGA:PCL=4:6, and (d) PLGA:PCL=2:8.

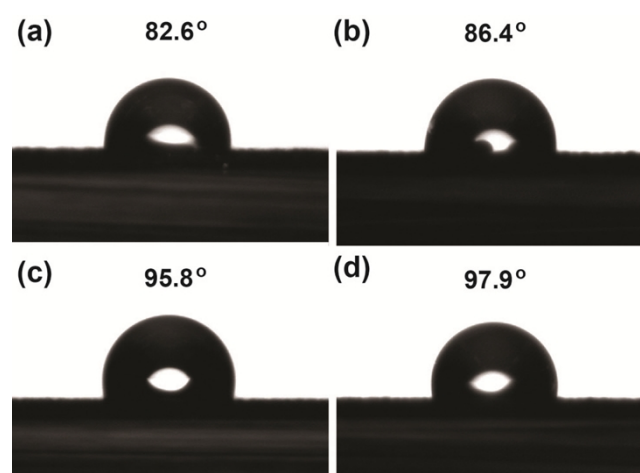

**Figure S2.** Photograph of water droplets on single layers of microparticles formed from various PLGA/PCL blend ratio: (a)10:0, (b) 8:2, (c) 7:3, and (d) 0:10.

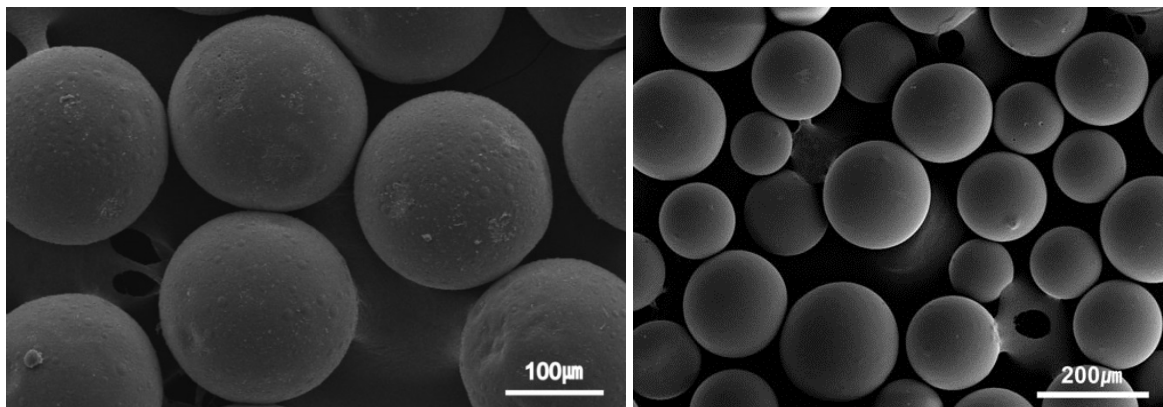

**Figure S3.** Uniform sized core-shell type microparticles from PLGA/PCL blend ratio of 7:3 using microfluidic device (left) and PLGA microparticles prepared from dropping organic droplets into the 1% PVA aqueous solution in the beaker stirred at 300 rpm (right).

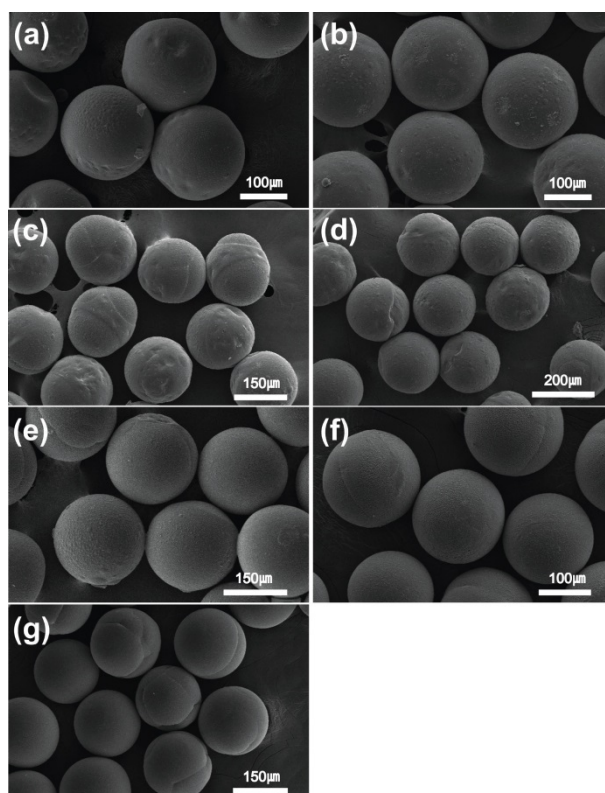

**Figure S4.** Uniform sized microparticles from PLGA/PCL blend ratio of (a) 8:2, (b) 7:3, (c) 6.5:3.5, (d) 6:4, (e) 5.5:4.5, (f) 4:6 and (g) 2:8.

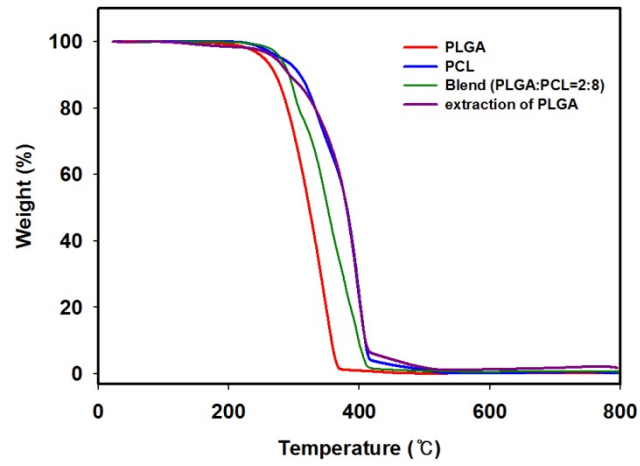

**Figure S5.** Thermogravimetric analysis (TGA) profiles of PLGA, PCL, PLGA/PCL blend and selective extraction of PLGA.

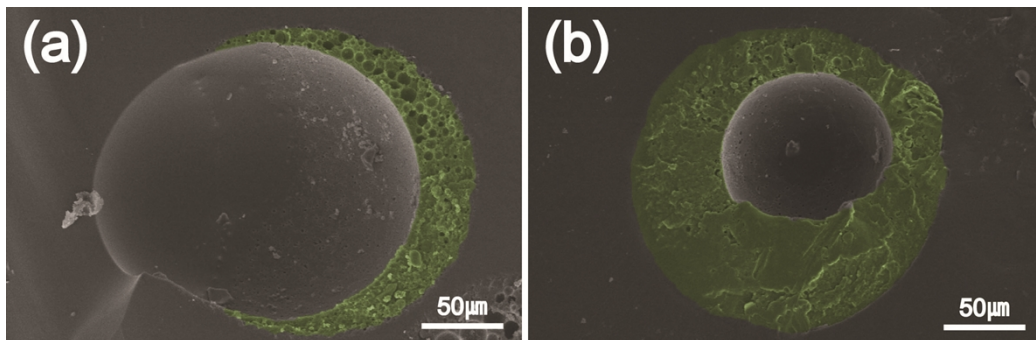

**Figure S6.** False color SEM images showing cross-section of the selective extraction of PLGA. (a) PLGA:PCL=6:4, (b) PLGA:PCL=4:6. In this cross-section, the PCL portion is green.

**Table S1.** Microparticles size obtained from various ratio of PLGA and PCL.

| Sample           | Average(Standard deviation)     |
|------------------|---------------------------------|
| PLGA:PCL=10:0    | 185.1 ( $\pm 2.7\mu\text{m}$ )  |
| PLGA:PCL=8:2     | 203.4 ( $\pm 5.3\mu\text{m}$ )  |
| PLGA:PCL=7:3     | 206.9 ( $\pm 3.0\mu\text{m}$ )  |
| PLGA:PCL=6.5:3.5 | 193.7 ( $\pm 5.1\mu\text{m}$ )  |
| PLGA:PCL=6:4     | 205.3 ( $\pm 4.6\mu\text{m}$ )  |
| PLGA:PCL=5.5:4.5 | 217.2 ( $\pm 6.3\mu\text{m}$ )  |
| PLGA:PCL=5:5     | 207.2 ( $\pm 1.8\mu\text{m}$ )  |
| PLGA:PCL=4:6     | 187.0 ( $\pm 7.8\mu\text{m}$ )  |
| PLGA:PCL=2:8     | 197.2 ( $\pm 5.5\mu\text{m}$ )  |
| PLGA:PCL=0:10    | 203.7 ( $\pm 2.6\mu\text{m}$ )  |
| Total            | 199.6 ( $\pm 10.2\mu\text{m}$ ) |

**Table S2.** TGA results for PLGA, PCL, PLGA/PCL blend, selective extraction of PLGA. ( $T_{50\%}$  : mid-point of the degradation)

| Sample                       | $T_{50\%}$ ( $^{\circ}\text{C}$ ) |
|------------------------------|-----------------------------------|
| PLGA                         | 323                               |
| PCL                          | 380                               |
| PLGA/PCL blend               | 350                               |
| Selective extraction of PLGA | 380                               |
